# Supplementary material for: Colloidal crystal beads coated with multicolor CdTe quantum dots: microcarriers for optical encoding and fluorescence enhancement
Source: Royal Society of Chemistry journal article supplement (doi:10.1039/b908830j), 2009-01-01
Supplement: b908830j.pdf [file b908830j.pdf]

Electronic Supplementary Information (ESI) for

Journal of Materials Chemistry

This journal is (c) The Royal Society of Chemistry 2009

**Colloidal crystal beads coated with multicolored CdTe  
quantum dots: microcarriers for optical encoding and  
fluorescence enhancement**

Juan Li, Xiangwei Zhao, Yuanjin Zhao, Jing Hu, Ming Xu and Zhongze Gu\*

State Key Laboratory of Bioelectronics, School of Biological Science and Medical  
Engineering, Southeast University, Nanjing 210096, China;

and Suzhou Key Laboratory of Environment and Biosafety, Research Institute of  
Southeast University in Suzhou, Dushu Lake Higher Education Town, Suzhou 215123,  
China

Email: [gu@seu.edu.cn](mailto:gu@seu.edu.cn)

## The fluorescence images

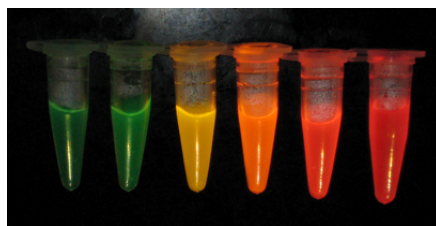

**Figure S1.** The photograph of brightly emitting CdTe QDs of different sizes taken under UV-lamp excitation.

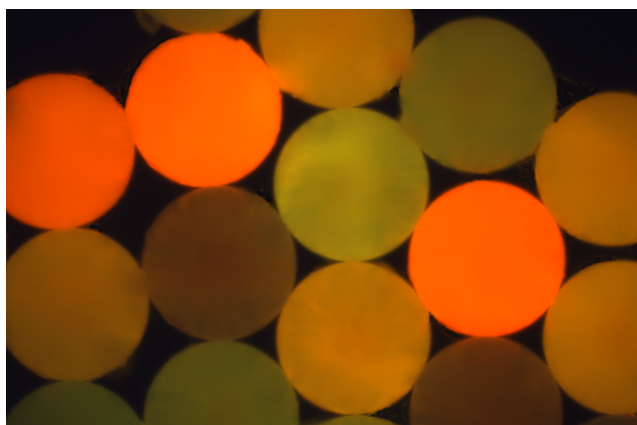

**Figure S2.** Fluorescence micrograph of a mixture of different colors CdTe QDs deposited onto SCCBs.

## The laser scanning confocal cross-section images

The laser scanning confocal cross-section images of SCCBs and glass beads after DNA hybridization assays were showed in Figure S3. Obviously, the fluorescence signal intensity of the SCCBs showed a much higher numerical value than the glass beads.

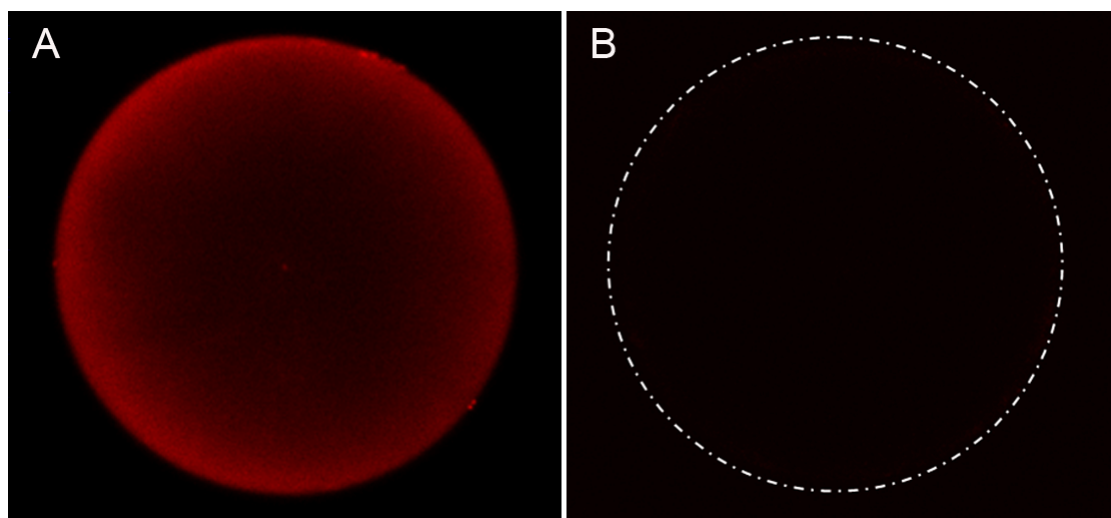

**Figure S3.** The scanned fluorescence images of SCCBs (A) and glass beads (B) after DNA hybridization assays.
